# Supplementary material for: Contributions of Nature-Based Solutions to Reduce Peoples’ Vulnerabilities to Climate Change across the Rural Global South
Source: Preprints.org preprint supplement (doi:10.20944/preprints202110.0403.v1), 2021-10-27
Supplement: Supplementary file 1 [file supplementary]

| Adhikari, S., Baral, H., & Nitschke, C. (2018). Adaptation to Climate Change in *Panchase* Mountain Ecological Regions of Nepal. *Environments,* 5(42): 1-18. |
| --- |
| Ahammad, R., Nandy, P., & Husnain, P. (2013). Unlocking ecosystem based adaptation opportunities in coastal Bangladesh. *Journal of Coastal Conservation*, 17(4): 833–840. |
| Baba, C.A.K., & Hack, H. (2019). Economic valuation of ecosystem services for the sustainable management of agropastoral dams. A case study of the Sakabansi dam, northern Benin. *Ecological Indicators,* 107: 105648. |
| Badola, R.U.C.H.I., & Hussain, S.A. (2005). Valuing ecosystem functions: an empirical study on the storm protection function of Bhitarkanika mangrove ecosystem, India. *Environmental Conservation*, 32(1): 85–92. |
| Belem, B., Kaguembega-Mueller, F., Bellefontaine, R., Sorg, J.R., Bloesch, U., & Graf, E. (2017). Assisted natural regeneration with fencing central and northern zones of Burkina Faso. *Tropicultura*, 35(2): 73–86. |
| Belgacem, A.O., Salem, F.B., Gamoun, M., Chibani, R., & Louhaichi, M. (2019). Revival of traditional best practices for rangeland restoration under climate change in the dry areas: A case study from Southern Tunisia. *International Journal of Climate Change Strategies and Management,* 11(5): 643-659. |
| Brown, D.R., Dettmann, P., Rinaudo, T., Tefera, H., & Tofu, A. (2011). Poverty alleviation and environmental restoration using the clean development mechanism: a case study from Humbo, Ethiopia. *Environmental Management,* 48(2): 322–333. |
| Chigwada, J. (2005). Case Study 6: Zimbabwe Climate Proofing Infrastructure and Diversifying Livelihoods in Zimbabwe. *IDS Bulletin,* 36(4):103 - 116 |
| Chowdhury, M.S.N., Walles, B., Sharifuzzaman, S.M., Shahadat Hossain, M., Ysebaert, T., & Smaal, A.C. (2019). Oyster breakwater reefs promote adjacent mudflat stability and salt marsh growth in a monsoon dominated subtropical coast. *Scientific Reports,* 9: 8549. |
| Cinner, J.E., Huchery, C., Darling, E.S., Humphries, A.T., Graham, N.A., Hicks, C.C., Marshall, N., & McClanahan, T.R. (2013). Evaluating social and ecological vulnerability of coral reef fisheries to climate change. *Plos One*, 8(9): 74321. |
| Claire, B., & Joseph, O.O. (2017). Trade-offs for climate-resilient pastoral livelihoods in wildlife conservancies in the Mara ecosystem, Kenya. Pastoralism, 7(1): 10–10. |
| Crossland, M., Winowiecki, L.A., Pagella, T., Hadgu, K., & Sinclair, F. (2018). Implications of variation in local perception of degradation and restoration processes for implementing land degradation neutrality. *Environmental Development*, 28: 42-54. |
| Derak, M., Cortina, J., Taiqui, L., & Aledo, A. (2018). A proposed framework for participatory forest restoration in semiarid areas of North Africa. *Restoration Ecology,* 26(1): 18-25. |
| Descheemaeker, K., Mapedza, E., Amede, T., & Ayalneh, W. (2010). Effects of integrated watershed management on livestock water productivity in water scarce areas in Ethiopia. *Physics and Chemistry of the Earth*, 35(13-14): 723–729. |
| Duncan, C., Primavera, J.H., Pettorelli, N., Thompson, J.R., Loma, R.J., & Koldewey, H.J. (2016). Rehabilitating mangrove ecosystem services: a case study on the relative benefits of abandoned pond reversion from Panay island, Philippines. *Marine Pollution Bulletin*, 109(2): 772–82. |
| Edstedt, K. & Carton, W. (2018). The benefits that (only) capital can see? Resource access and degradation in industrial carbon forestry, lessons from the CDM in Uganda. *Geoforum*, 97: 315-323 |
| El-Bana, M.I., Nijs, I., & Khedr, A.-H.A. (2003). The importance of phytogenic mounds (nebkhas) for restoration of arid degraded rangelands in Northern Sinai. *Restoration Ecology*, 11(3): 317–324. |
| Eriksson, H., Albert, J., Albert, S., Warren, R., Pakoa, K., & Andrew, N. (2017). The role of fish and fisheries in recovering from natural hazards: lessons learned from Vanuatu. *Environmental Science and Policy,* 76: 50–58. |
| Fedele, G., Locatelli, B., Djoudi, H., & Colloff, M. (2018). Reducing risks by transforming landscapes: Cross-scale effects of land-use changes on ecosystem services. *PLOS ONE,* 1-21. |
| Feyisa, D., Kissi, E., & Kebebew, Z. (2018). Rethinking *Eucalyptus globulus* Labill. Based Land Use Systems in Smallholder Farmers Livelihoods: A Case of Kolobo Watershed, West Shewa, Ethiopia. *Ekológia (Bratislava):* 37(1): 57-68. |
| Imam et al 2016 |
| Jessie, A.W., Kerrie, A.W., Nicola, K.A., Malcolm, N., David, L.A.G., Rebecca, K.R., Nina, T., Kerrie, L.M., & Erik, M. (2016). Rising floodwaters: mapping impacts and perceptions of flooding in Indonesian Borneo. *Environmental Research Letters*, 11(6). |
| Kashaigili, J.., Rajabu, K., & Masolwa, P.. (2009). Freshwater management and climate change adaptation: experiences from the great Ruaha river catchment in Tanzania. *Climate and Development*, 1(3): 220–228 |
| Kaushal, K.K., Melkani, V.K., & Kala, J.C. (2005). Sustainable poverty alleviation through a forestry project in Tamilnadu state of India. *International Journal of Sustainable Development & World Ecology*, 12(3): 347–352. |
| Khamzina, A., Sommer, R., Lamers, J.P.A., & Vlek, P.L.G. (2009). Transpiration and early growth of tree plantations established on degraded cropland over shallow saline groundwater table in northwest Uzbekistan. *Agricultural and Forest Meteorology*, 149(11): 1865–1874. |
| Khansaritoreh, E., Eldarov, M., Ganbaatar, K. *et al.* (2017). Age structure and trends in annual stem increment of *Larix sibirica* in two neighboring Mongolian forest–steppe regions differing in land use history. *Trees,* 31**:** 1973–1986. |
| Kimiti, D.W., Riginos, C., & Belnap, J. (2017). Low-cost grass restoration using erosion barriers in a degraded African rangeland. *Restoration Ecology*, 25(3): 376–384. |
| Koutika, L.S. (2019). Afforesting savannas with Acacia mangium and eucalyptus improves P availability in Arenosols of the Congolese coastal plains. *Geoderma Regional,* 15: e00207. |
| Kupika, O.L., Gandiwa, E., Nhamo, G., & Kativu, S. (2019). Local Ecological Knowledge on Climate Change and Ecosystem-Based Adaptation Strategies Promote Resilience in the Middle Zambezi Biosphere Reserve, Zimbabwe. *Hindawi Scientifica,* 3069254. |
| Lin, T., Htun, K.T., Gritten, D., & Martin, A.R. (2019). The Contribution of Community Forestry to Climate Change Adaptive Capacity in Tropical Dry Forests: Lessons from Myanmar. *International Forestry Review,* 21(3): 324-340. |
| Lunga, W., & Musarurwa, C. (2016). Exploiting indigenous knowledge commonwealth to mitigate disasters: from the archives of vulnerable communities in Zimbabwe. |
| McElwee, P., Thi Nguyen, V., Nguyen, D., Tran, N., Le, H., Nghiem, T., & Thi Vu, H. (2016). Using redd policy to facilitate climate adaptation at the local level: synergies and challenges in Vietnam. *Forests*, 8(1): 11–11. |
| Mekuria, W., Langan, S., Johnston, R., Belay, B., Amare, D., Gashaw, T., Desta, G., Noble, A., & Wale, A. (2015). Restoring aboveground carbon and biodiversity: a case study from the Nile basin, Ethiopia. *Forest Science and Technology*, 11(2): 86–96. |
| Mora-Garcia, C., Campos Jr, R.B., & Seronay, R.A. (2020). Perceived Ecosystem Services Towards the Conservation of Agusan Marsh Wildlife Sanctuary In Mindanao, Philippines. *International Journal of Conservation Science,* 11(1): 199-208. |
| Mureithi, S.M., Verdoodt, A., Njoka, J.T., Gachene, C.K.K., & Van Ranst, E. (2016). Benefits derived from rehabilitating a degraded semi-arid rangeland in communal enclosures, Kenya. *Land Degradation & Development*, 27(8): 1853–1862. |
| Ngwese, N.M., Saito, O., Sato, A., Boafo, Y.A., Jasaw, G. (2018). Traditional and Local Knowledge Practices for Disaster Risk Reduction in Northern Ghana. *Sustainability,* 10(825):1-17. |
| Norris, C., Hobson, P., & Ibisch, P.L. (2012). Microclimate and vegetation function as indicators of forest thermodynamic efficiency. *Journal of Applied Ecology*, 49(3): 562–570. |
| Ogutu, Z.A. (2002). The impact of ecotourism on livelihood and natural resource management in Eselenkei, amboseli ecosystem, Kenya. *Land Degradation & Development*, 13(3): 251–256. |
| Osano, P.M., Said, M.Y., de, L.J., Moiko, S.S., Kaelo, D.O., Schomers, S., Birner, R., & Ogutu, J.O. (2013). Pastoralism and ecosystem-based adaptation in Kenyan Masailand. *International Journal of Climate Change Strategies and Management*, 5(2): 198–214. |
| Osano, P.M., Said, M.Y., Leeuw, J., Ndiwa, N., Kaelo, D., Schomers, S., Birner, R., & Ogutu, J.O. (2013). Why keep lions instead of livestock? assessing wildlife tourism-based payment for ecosystem services involving herders in the Maasai Mara, Kenya. *Natural Resources Forum*, 37(4): 242–256. |
| Pandey, S.S., Cockfield, G., & Maraseni, T.N. (2016). Assessing the roles of community forestry in climate change mitigation and adaptation: a case study from Nepal. *Forest Ecology and Management*, 360, 400–407. |
| Pattanayk, S. & Kramer, R. (2001). Worth of watersheds: a producer surplus approach for valuing drought mitigation in Eastern Indonesia. *Environment and Development Economics*, 6(1): 123–146. |
| Paudyal, K., Baral, H., Bhandari, S.P., Bhandari, A., & Keenan, R.J. (2019). Spatial assessment of the impact of land use and land cover change on supply of ecosystem services in Phewa watershed, Nepal. *Ecosystem Services,* 36: 100895. |
| Rahman, S., Islam, N., Kahn, M.N.H., & Touhiduzzaman, M. (2019). Climate change adaptation and disaster risk reduction (DRR) through coastal afforestation in South-Central Coast of Bangladesh. *Management of Environmental Quality: An International Journal,* 30(3):498-517. |
| Ramachandra, T.V., Vinay, S., Bharath, S., & Shashishankar, A. (2018). Eco-Hydrological Footprint of a River Basin in Western Ghats. *The Yale Journal of Biology and Medicine*, 91: 431 - 444. |
| Rangan, H., Kull, C.A., & Alexander, L. (2010). Forest plantations, water availability, and regional climate change: controversies surrounding acacia mearnsii plantations in the upper Palnis Hills, Southern India. *Regional Environmental Change*, 10(2): 103–117. |
| Russell, S., Tyrell, P., & Western, D. (2018). Seasonal interactions of pastoralists and wildlife in relation to pasture in an African savanna ecosystem. *Journal of Arid Environments,* 154: 70-81. |
| Safari, J., Singu, I., Masanyiwa, Z., & Hyandya, C. (2019). Social perception and determinants of *Ngitili* system adoption for forage and land conservation in Maswa district, Tanzania. *Journal of Environmental Management,* 250: 109498. |
| Sapkota, P., Keenan, R., & Ojha, H. (2019). Co-evolving dynamics in the social-ecological system of community forestry—prospects for ecosystem-based adaptation in the Middle Hills of Nepal. *Regional Environmental Change,* 19: 179-192. |
| Sears, R., Choden, K., Dorji, T., Dukpa, D., Phuntsho, S., Rai, P.B., Wangchuk, J., & Baral, H. (2018). Bhutan’s Forests through the Framework of Ecosystem Services: Rapid Assessment in Three Forest Types. *Forests,* 9(675): 1-13. |
| Siraw, Z., Bewket, W., Degefu, M.A. (2019). Effects of Community‐Based Watershed Development on Landscape Greenness and Vegetation Cover in the Northwestern Highlands of Ethiopia. *Earth Systems and Environment,* 4: 245-256. |
| Strauch, A.M., Rurai, M.T., & Almedom, A.M. (2016). Influence of forest management systems on natural resource use and provision of ecosystem services in Tanzania. *Journal of Environmental Management*, 180, 35–44. |
| Talema, A., Poesen, J., Muys, B., Padro, R., Dibaba, H., & Diels, J. (2018). Survival and growth analysis of multipurpose trees, shrubs, and grasses used to rehabilitate badlands in the subhumid tropics. *Land Degradation Development,* 30: 470-480. |
| Thes, N., Gombert, A., Strenge, E., Lleshi, R., Aliev, K., & Emileva, B. (2019). Tree Wind Breaks in Central Asia and Their Effects on Agricultural Water Consumption. *Land,* 8(167): 1-17. |
| Tran, L. & Brown, K. (2018). The importance of ecosystem services to smallholder farmers in climate change adaptation: learning from an ecosystem-based adaptation pilot in Vietnam. *Agroforestry Systems,* 93: 1949-1960. |
| Verdoodt, A., Mureithi, S.M., Ye, L., & Van Ranst, E. (2009). Chronosequence analysis of two enclosure management strategies in degraded rangeland of semi-arid Kenya. *Agriculture, Ecosystems and Environment*, 129(1): 332–339. |
| Wairore, J.N., Mureithi, S.M., Wasonga, O.V., & Nyberg, G. (2016). Benefits derived from rehabilitating a degraded semi-arid rangeland in private enclosures in West Pokot County, Kenya. *Land Degradation & Development*, 27(3): 532–541. |
| Walton, M., Samonte-Tan, G., Primavera, J., , Edwards-Jones, G. & Le Vay, L.(2006). Are mangroves worth replanting? the direct economic benefits of a community-based reforestation project. *Environmental Conservation*, 33(4): 335–343. |
| Welemariam, M., Kebede, F., Bedadi, B., & Birhane, E. (2018). Effect of community-based soil and water conservation practices on soil glomalin, aggregate size distribution, aggregate stability and aggregate-associated organic carbon in northern highlands of Ethiopia. *Agriculture & Food Security,* 7(42): 1-11. |
| Woldie, B.A., & Tadesse, S.A. (2019). Views and attitudes of local people towards community versus state forest governance in Tehulederi District, South Wollo, Ethiopia. *Ecological Processes,* 8(4): 1-20. |
| Wood, B.T., Quinn, C.H., Stringer, L.C., & Dougill, A.J. (2017). Investigating climate compatible development outcomes and their implications for distributive justice: evidence from Malawi. *Environmental Management*, 60(3): 436–453. |
| Zongo, B., Zongo, F., Boussim, J.I., & Toguyeni, A. (2017). Water quality in forest and village ponds in Burkina Faso (Western Africa). *Journal of Forestry Research,* 28(5): 1039–1048. |
|  |
|  |
|  |
|  |
|  |
|  |
|  |
|  |
|  |
|  |
|  |
|  |
|  |
|  |
|  |
|  |
|  |
|  |
